# Supplementary material
Source: publisher figshare collection journal article supplement (https://geolsoc.figshare.com/articles/dataset/_/3453170)

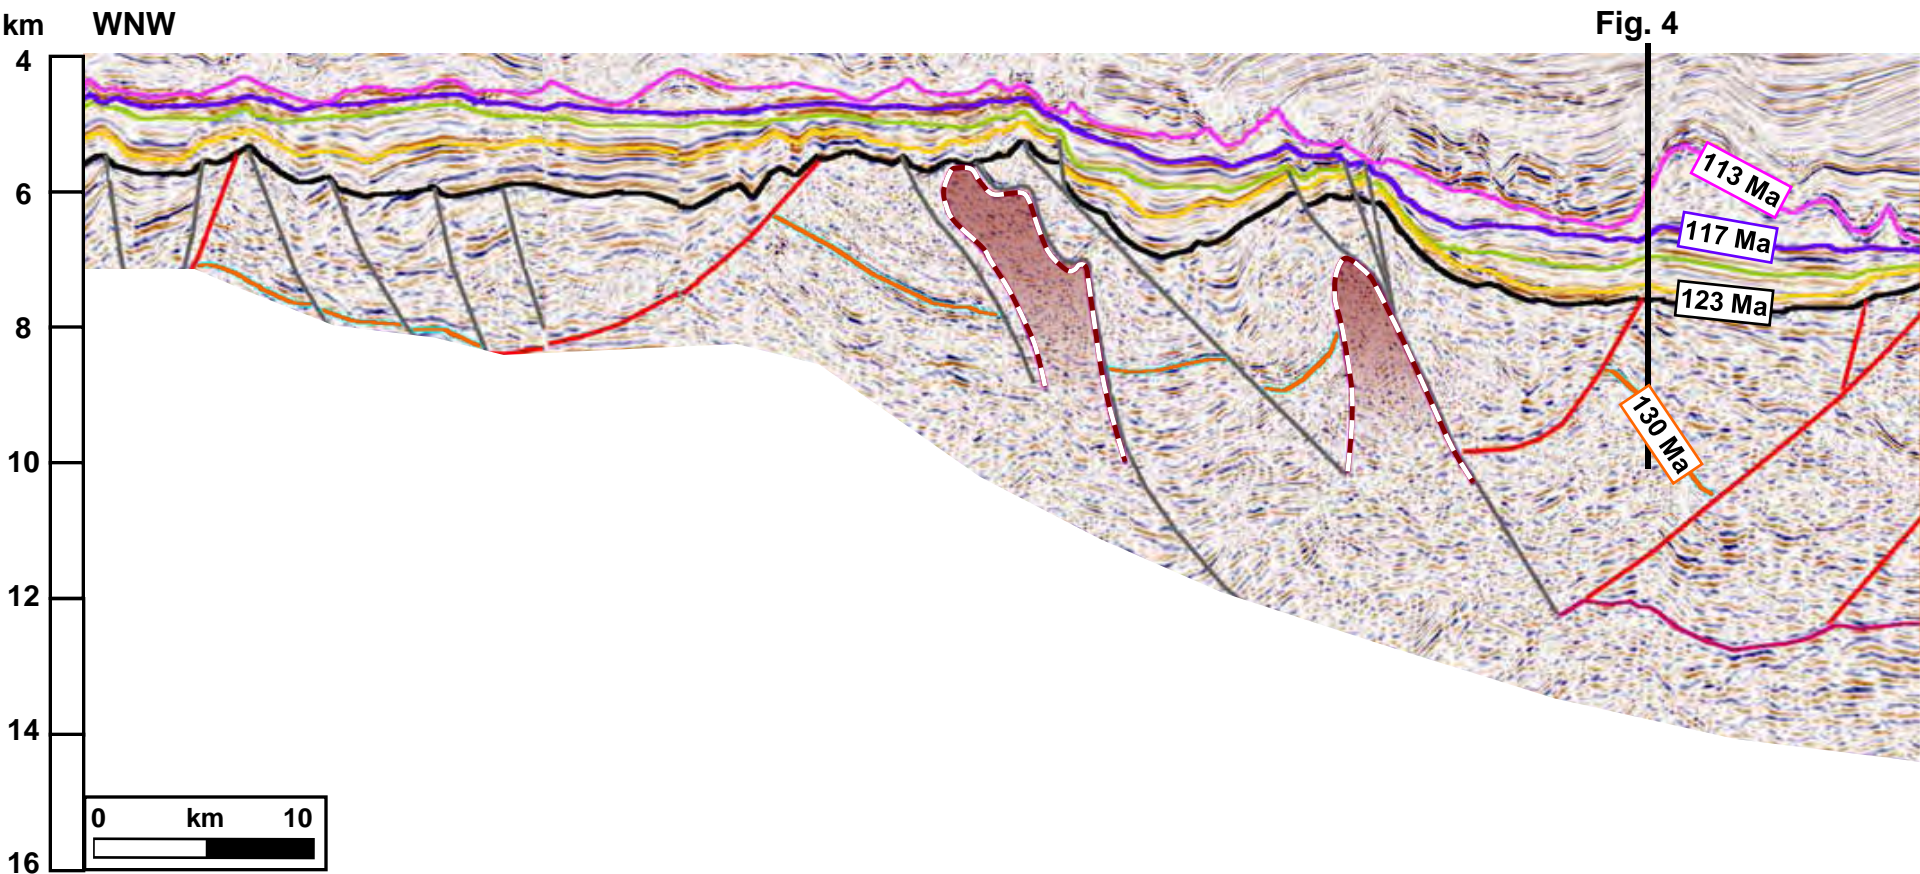



Fig. 4

ESE

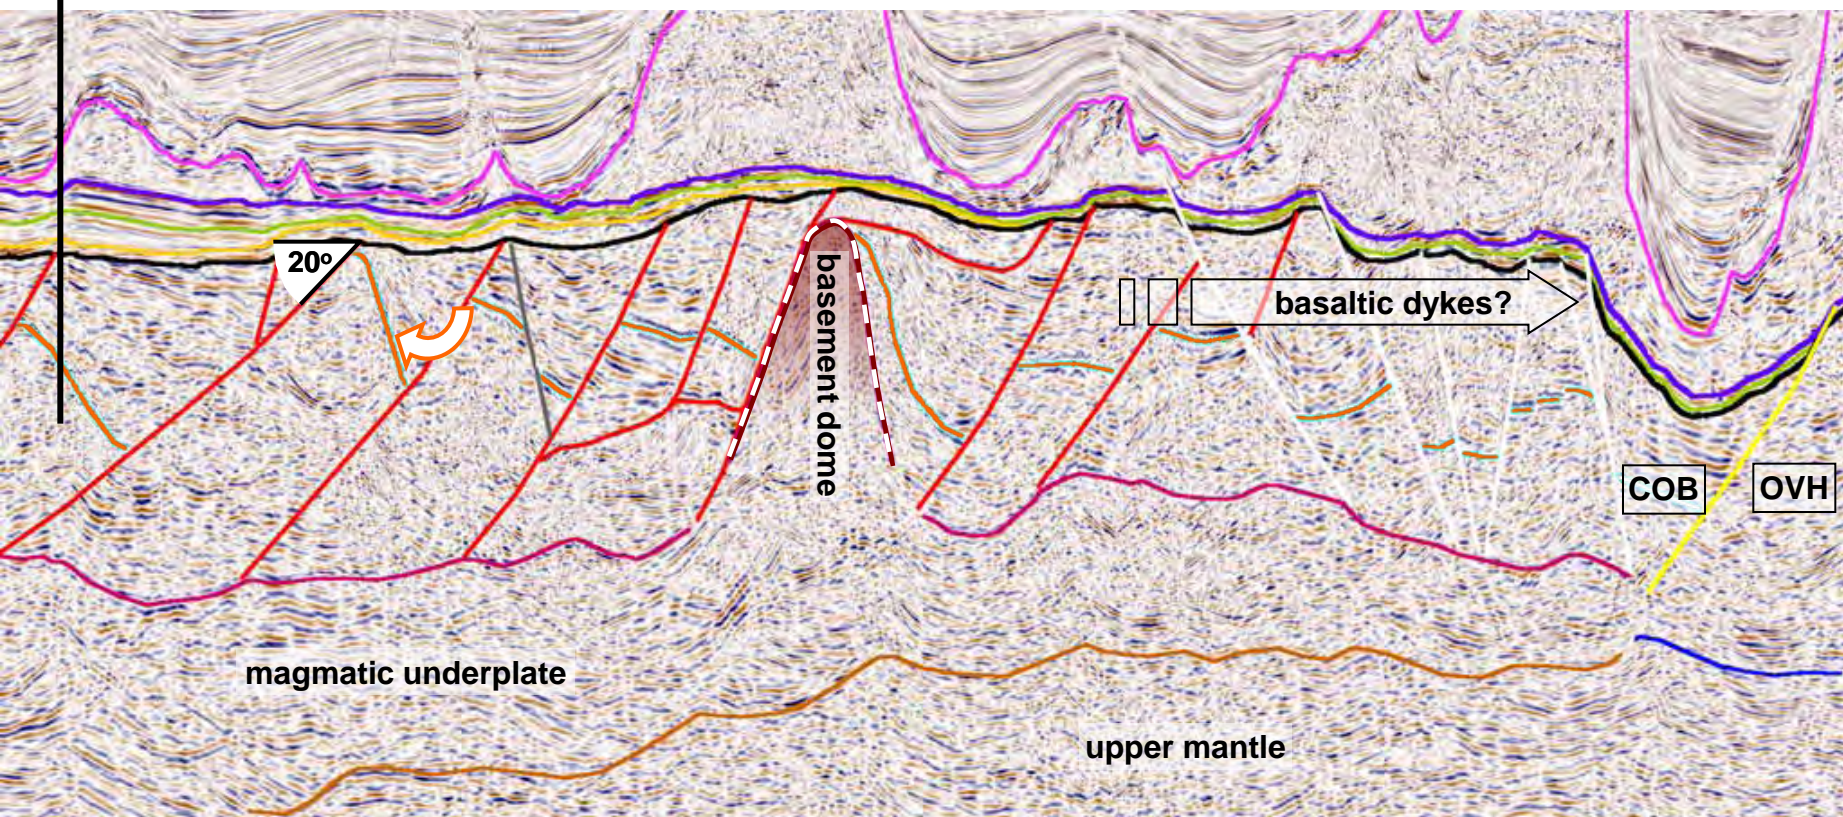



WNW

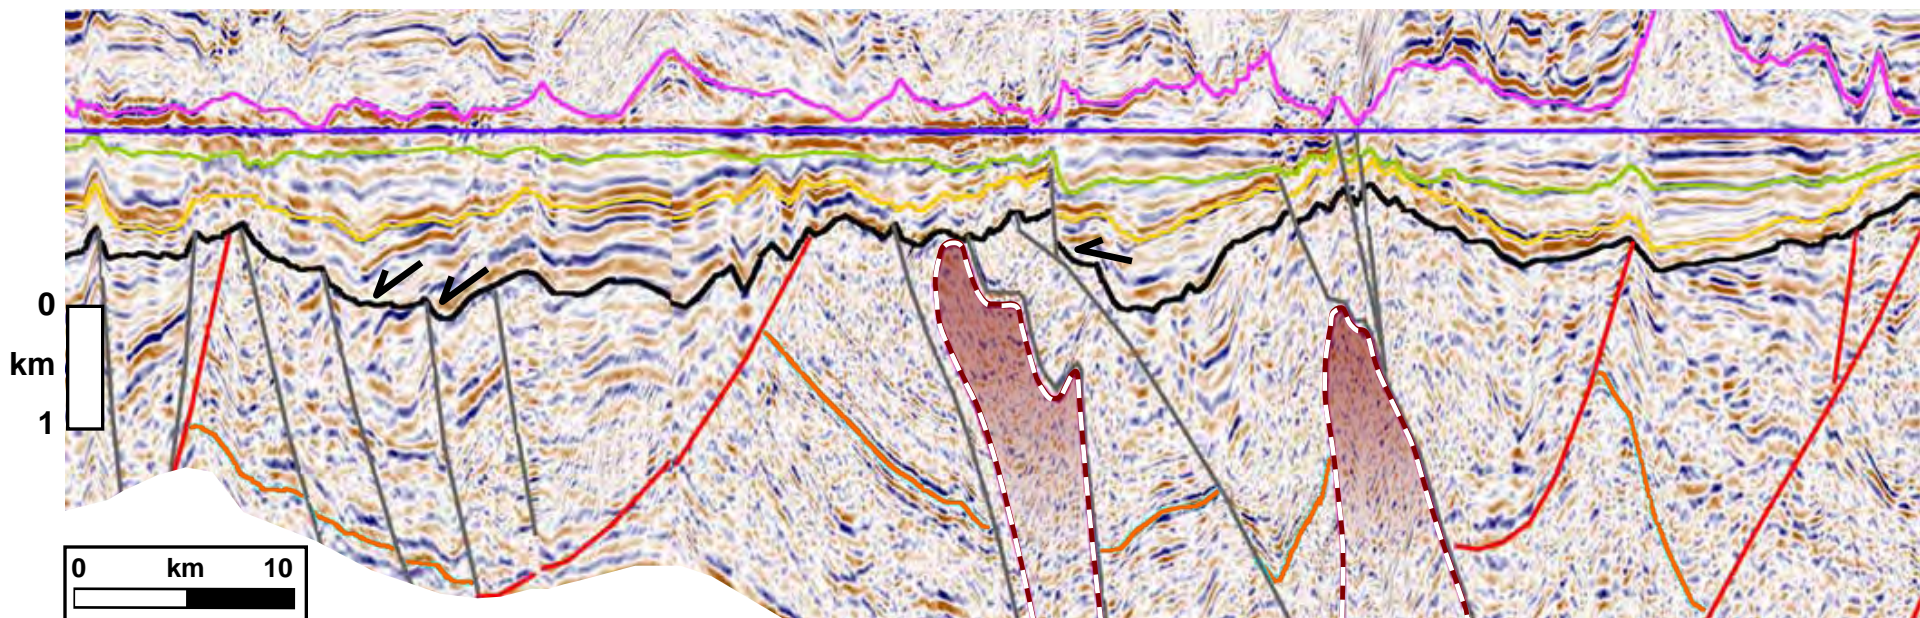



ESE

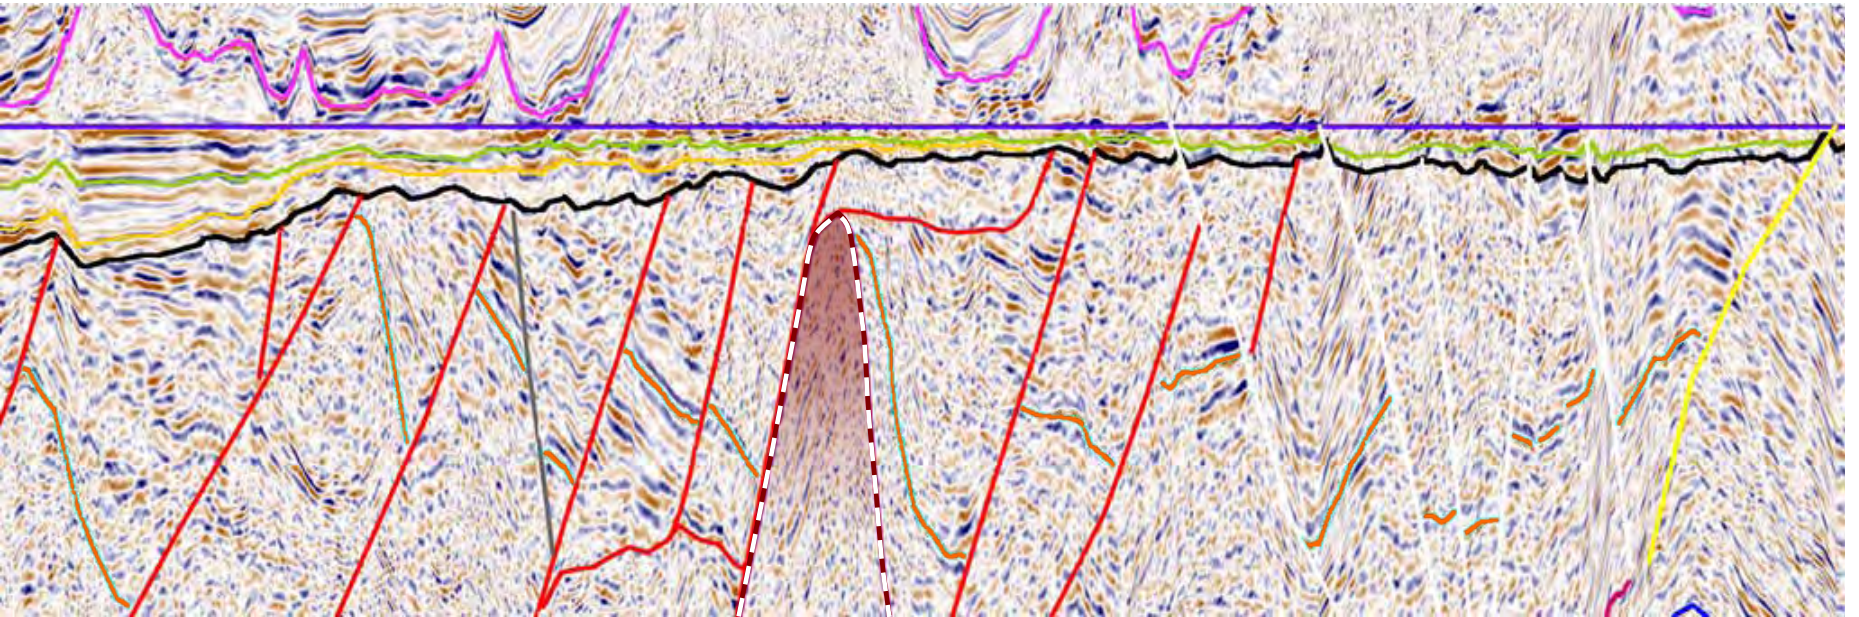



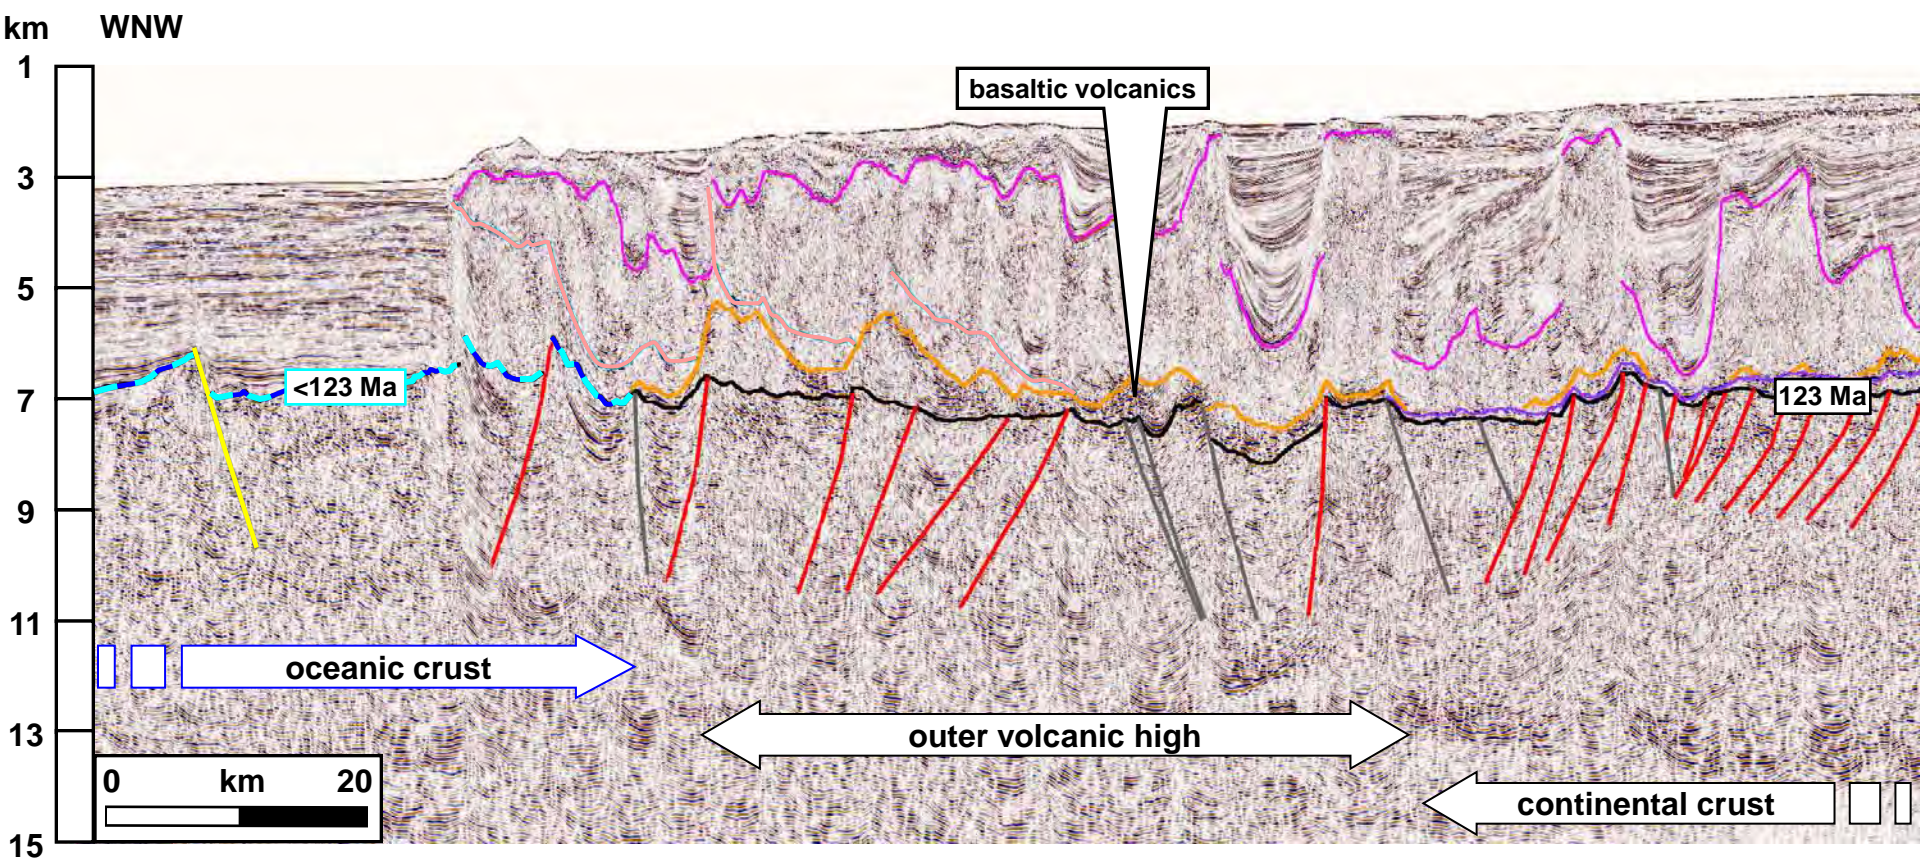



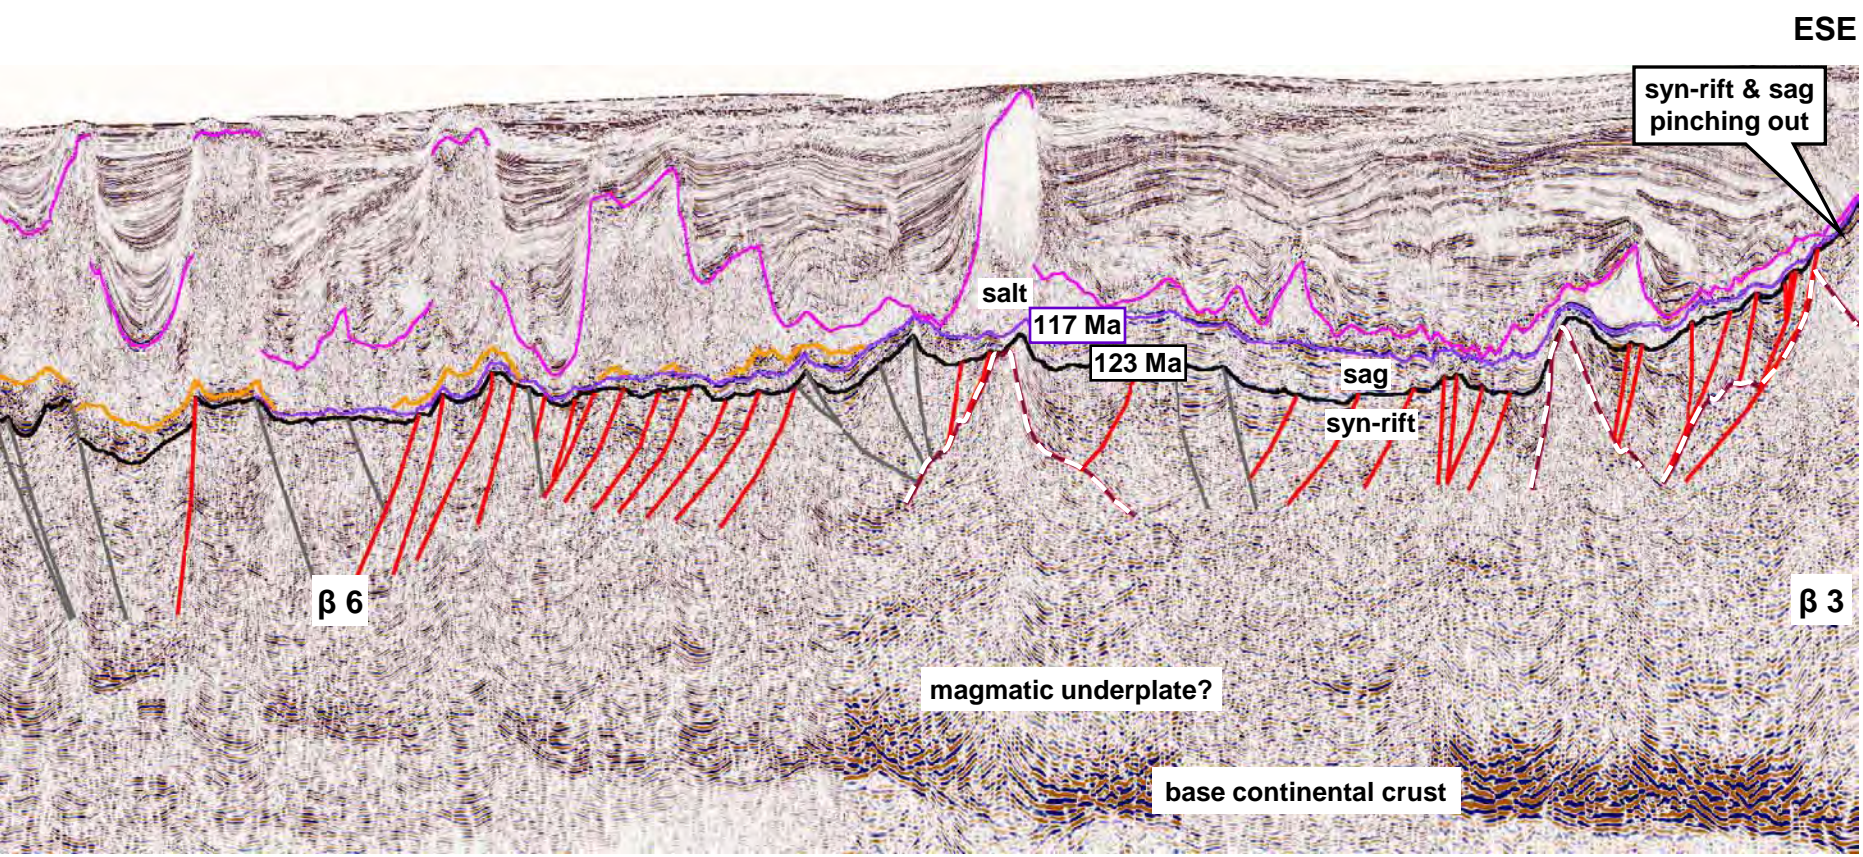

Supplement: Supplementary file 1 [file 1]
